# Supplementary material for: Zeolitic octahedral metal oxide-based membranes for pervaporative desalination of concentrated brines
Source: Royal Society of Chemistry journal article supplement (doi:10.1039/d0cc08014d), 2021-01-01
Supplement: d0cc08014d1.pdf [file d0cc08014d1.pdf]

**Supporting Information**

**Zeolitic octahedral metal oxide-based membranes for  
pervaporative desalination of concentrated brines**

Chaomin Chen <sup>a</sup>, Wenhao Zeng <sup>a</sup>, Qianqian Zhu <sup>a\*</sup>, Zhenxin Zhang <sup>a\*</sup>, Yanshuo Li <sup>a\*</sup>, Wataru Ueda <sup>b</sup>

## 1. Experimental details

### 1.1 Synthesis and ion-exchange of ZOMO-CTs

Referring to the method of synthesizing **ZOMO-CT** reported by Zhang et al.,<sup>1</sup>  $(\text{NH}_4)_6\text{H}_2\text{W}_{12}\text{O}_{40}\cdot x\text{H}_2\text{O}$  (3.97 g, 1.34 mmol) as the W source,  $\text{SeO}_2$  (0.284 g, 2.56 mmol) as the Se source, and  $\text{C}_4\text{H}_6\text{CoO}_4\cdot 4\text{H}_2\text{O}$  (0.400 g, 1.60 mmol) as the Co source were dissolved in 60 mL of water. The precursor solution for **ZOMO-CT** was obtained. The precursor solution was transferred to a Teflon-lined stainless autoclave and heated in an oven at 100 °C for 24 h. After the autoclave had been cooled to room temperature, the solid was collected by filtration and washed with water for several times and dried.

For ion-exchange procedure, 0.3 g of the as-synthesized **ZOMO-CT** was dispersed in 15 mL of water containing 3.5 wt% salts (i. g. NaCl,  $\text{CaCl}_2$ , KCl,  $\text{AlCl}_3\cdot 6\text{H}_2\text{O}$ , and  $\text{MgCl}_2\cdot 6\text{H}_2\text{O}$ ) and stirred for 30 min. After the ion-exchanged process, the sample was recovered by filtration and dried.

### 1.2 Synthesis and ion-exchange of ZOMO-CT-Ms

**ZOMO-CT-M** was prepared on  $\alpha\text{-Al}_2\text{O}_3$  supports (60 mm length, 12 mm outside diameter, 8 mm inside diameter, 34.19 % porosity) by the same hydrothermal method. The precursor solution for the membrane synthesis was prepared by mixing  $(\text{NH}_4)_6\text{H}_2\text{W}_{12}\text{O}_{40}\cdot x\text{H}_2\text{O}$  (3.97 g, 1.34 mmol),  $\text{SeO}_2$  (0.284 g, 2.56 mmol), and  $\text{C}_4\text{H}_6\text{CoO}_4\cdot 4\text{H}_2\text{O}$  (0.400 g, 1.60 mmol). The mixture was transferred to a Teflon-lined stainless autoclave with the  $\alpha\text{-Al}_2\text{O}_3$  tube placed vertically and heated in an oven at 100 °C for 24 h. The semi-finished membrane was washed with water for 1 h. The membrane synthesis process was repeated once more with the same procedure. The as-synthesized **ZOMO-CT-M** was washed with water and dried at room temperature.

The ion-exchange process of **ZOMO-CT-M** was carried out by using the pervaporation process. **ZOMO-CT-M** was set in the feed solution (3.5 wt% NaCl, KCl,  $\text{CaCl}_2$ ,  $\text{MgCl}_2\cdot 6\text{H}_2\text{O}$ , and  $\text{AlCl}_3\cdot 6\text{H}_2\text{O}$ ) to do pervaporation for 30 min. The different ion-exchanged **ZOMO-CT-Ms** were obtained.

### 1.3 ZOMO-Ca-CT-M regeneration

After using for desalination with 3.5 wt% of NaCl for 15 min, **ZOMO-Ca-CT-M** was regenerated in the feed solution (3.5 wt% CaCl<sub>2</sub>) for 30 min by pervaporation. The regenerated membrane was tested again in 3.5 wt% NaCl for 15 min.

#### 1.4 Characterizations

Powder X-ray diffraction (XRD) patterns of the materials and the membranes were obtained on a Bruker, D8 Advance with operating conditions of voltage of 40 KV, current of 40 mA, scan speed of 8 °/min, and 2θ range of 5 – 60°. Elemental compositions were determined by inductive coupling plasma (ICP-AES) method at analysis center of School of Material Science and Chemical Engineering, Ningbo University. Scanning electron microscopy (SEM) and Energy Dispersive X-ray (EDX) observations were carried out on a FEI, Nova Nano SEM 450, operating at 15 kV. Fourier transform infrared spectroscopy (FTIR) was conducted on a Bruker Vertex 70. Water adsorption isotherms were performed on a Micromeritics (3FLEX) apparatus. Prior to measurement, the samples were activated at 80 °C under dynamic vacuum for 2 h.

#### 1.5 Pervaporation measurement

The pervaporation measurement are shown in Figure S5. With a pressure difference between the both sides of the membrane, water was vaporized from the aqueous solution in one side of the membrane and condensed to a cold trap in another side of the membrane.

The flux is calculated by eq. 1, whereas the  $F$ ,  $M$ ,  $A$ ,  $t$  represent the membrane flux (kg·m<sup>-2</sup>·h<sup>-1</sup>), the permeate mass (kg), the membrane area (m<sup>2</sup>), and the time of desalination (h), respectively.

$$F = \frac{M}{At} \text{ (eq. 1)}$$

The salt rejection is also calculated by eq. 2. In this equation, the  $C_{i,F}$  is the concentration of the feed solution, the  $C_{i,p}$  means the concentration of the permeate solute, and the  $R_i$  represents the salt rejection.

$$R_i = \frac{C_{i,F} - C_{i,p}}{C_{i,F}} \times 100\% \text{ (eq. 2)}$$

To explain the transport of water molecule in pervaporation through **ZOMO-CT-Ms**, the solution-diffusion model was used to determine permeances that were related to the intrinsic properties of **ZOMO-CT-Ms**. Permeance is defined by the driving force normalized flux as eq. 3:

$$J_i = P_i(\alpha_i^f - \alpha_i^p) = P_i(x_i y_i p_i^{sat} - y_i p^p) \quad (\text{eq.3})$$

Where  $P_i$  is the permeance of the component  $i$  through the membrane,  $\alpha_i^f$  and  $\alpha_i^p$  are the activity of component  $i$  in the feed and permeate;  $\gamma_i$  is the activity coefficient calculated by ENRTL model,  $p_i^{sat}$  is the saturated vapor pressure of component calculated by the Antoine equation,  $p^p$  is the total pressure on the permeate side,  $x_i$  and  $y_i$  are the weigh fraction of component  $i$  in the feed and permeate, respectively.

In this study, since the permeate side was in an absolute vacuum state,  $\alpha_i^p$  was assumed to be 0. Therefore, as noted in eq. 4, permeance was given as:

$$P_i = \frac{J_i}{\alpha_i^f} = \frac{J_i}{x_i y_i p_i^{sat}} \quad (\text{eq. 4})$$

The activation energy for the permeation flux was calculated by the Arrhenius equation, as shown in eq. 5:

$$\frac{d \ln P_i}{dT} = \frac{E_p}{RT^2} \quad (\text{eq. 5})$$

Where  $E_p$ ,  $T$  and  $R$  are the apparent activation energy ( $\text{kJ} \cdot \text{mol}^{-1}$ ), the feed temperature (K), and the gas constant ( $\text{J} \cdot \text{mol}^{-1} \cdot \text{K}^{-1}$ ), respectively.

## 1.6 Computer based simulation

The structures of **ZOMO-CT** with different cation locations and different cation with water were optimized by the DFT calculation using the DMol<sup>3</sup> program<sup>2,3</sup> in the Materials Studio package. The Perdew–Burke–Ernzerhof (PBE) generalized gradient functional and DND basis set were used for calculation.

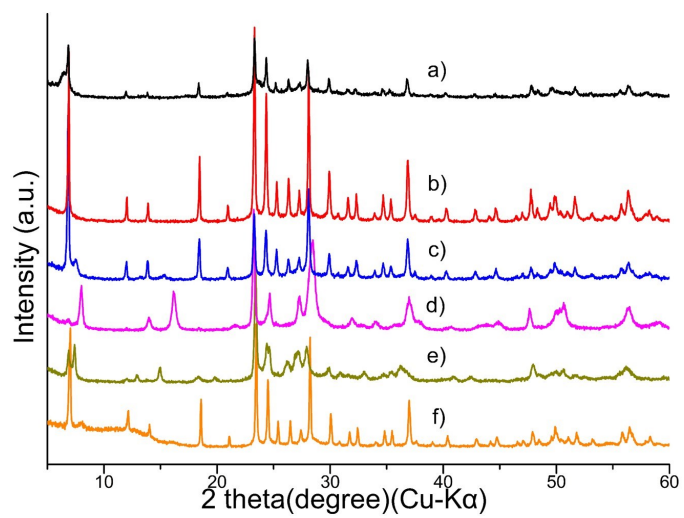

Figure S1. XRD patterns of a) **ZOMO-Al-CT**, b) **ZOMO-Mg-CT**, c) **ZOMO-Ca-CT**, d) **ZOMO-K-CT**, e) **ZOMO-Na-CT**, and f) **ZOMO-CT**.

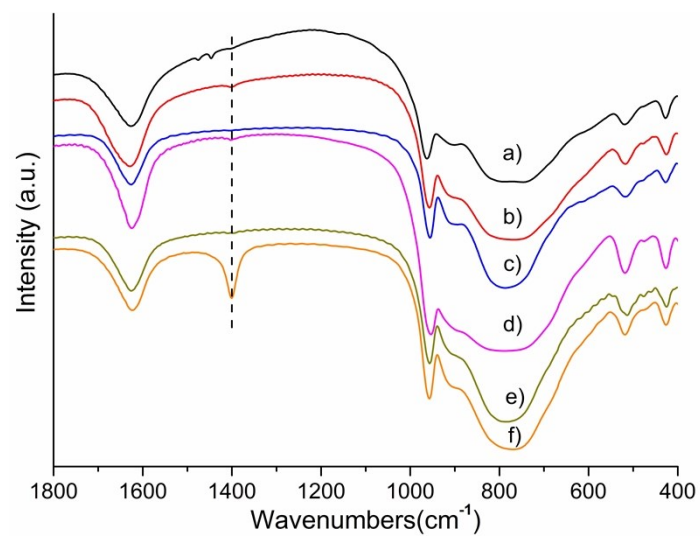

Figure S2. FTIR spectra of a) **ZOMO-Al-CT**, b) **ZOMO-Mg-CT**, c) **ZOMO-Ca-CT**, d) **ZOMO-K-CT**, e) **ZOMO-Na-CT**, and f) **ZOMO-CT**.

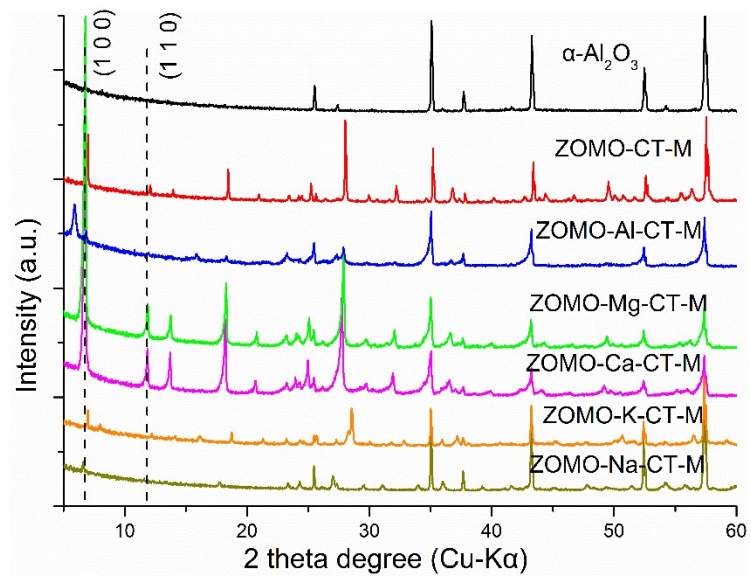

Figure S3. XRD patterns of **ZOMO-CT-Ms**.

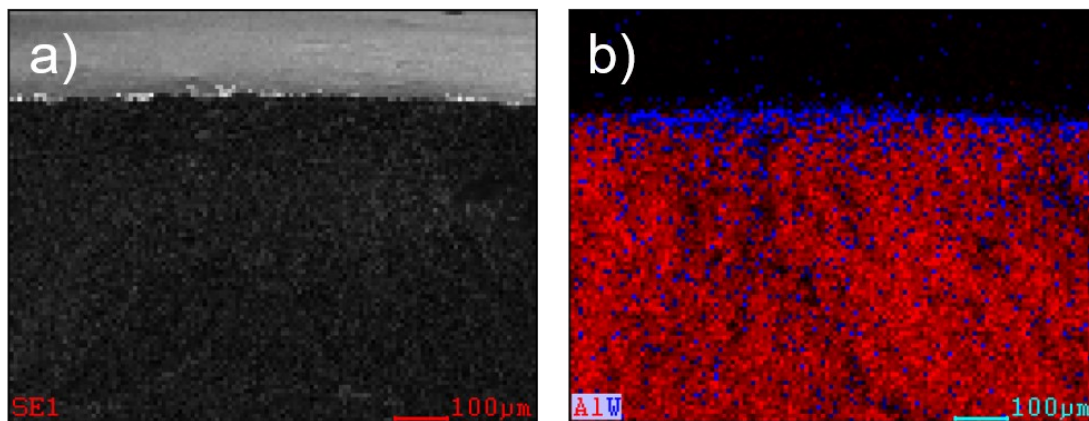

Figure S4. a) SEM image and b) EDX elemental mapping image of **ZOMO-CT** on the  $\alpha$ - $\text{Al}_2\text{O}_3$  support.



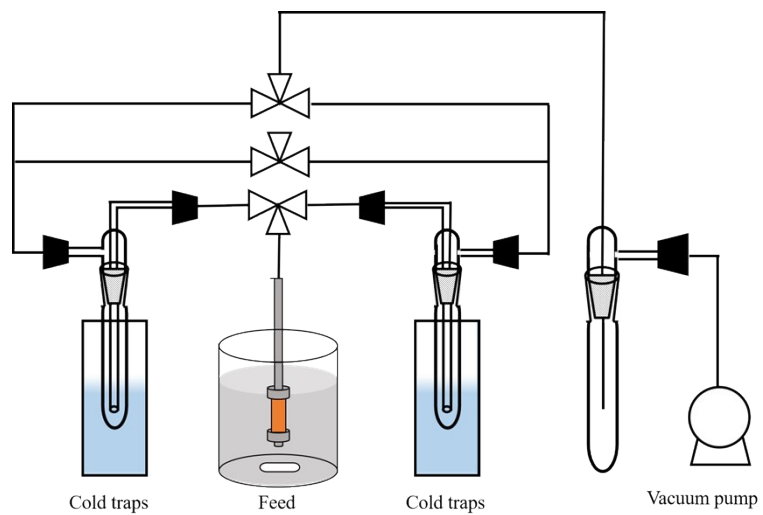

Figure S5. Pervaporation desalination scheme.

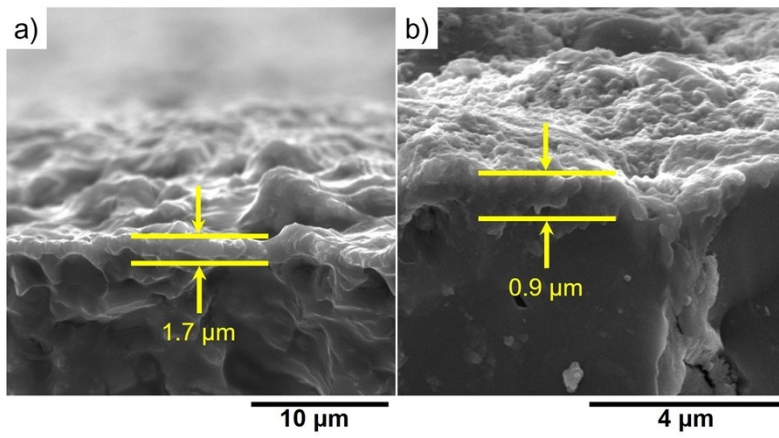

Figure S6. SEM image of the cross section of a) **ZOMO-CT-M** and b) **ZOMO-Al-CT-M**.

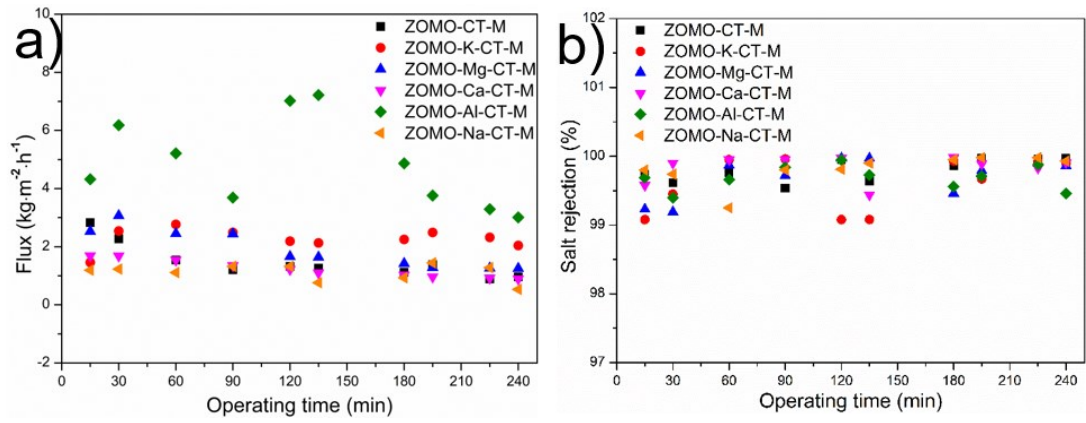

Figure S7. Permeation flux a) and salt rejection b) results of PV desalination as a function of 25 wt% NaCl feed solutions at 25 °C

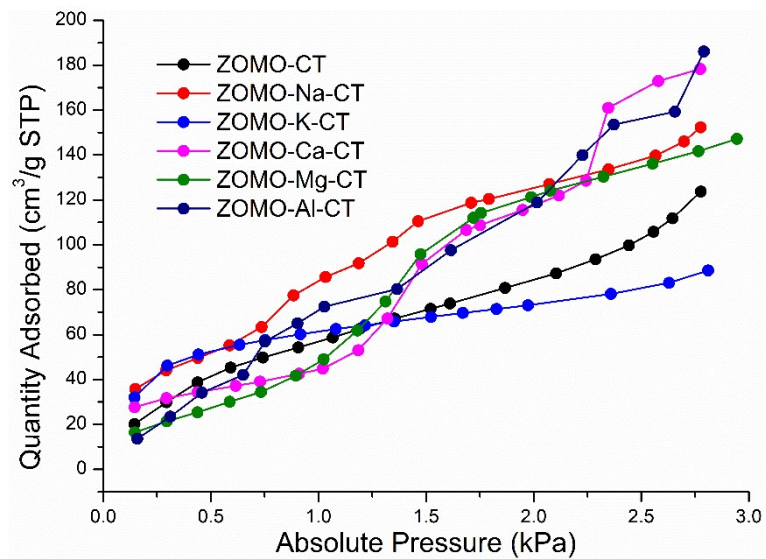

Figure S8. Water adsorption isotherms of ion-exchanged **ZOMO-CTs** at 25 °C.

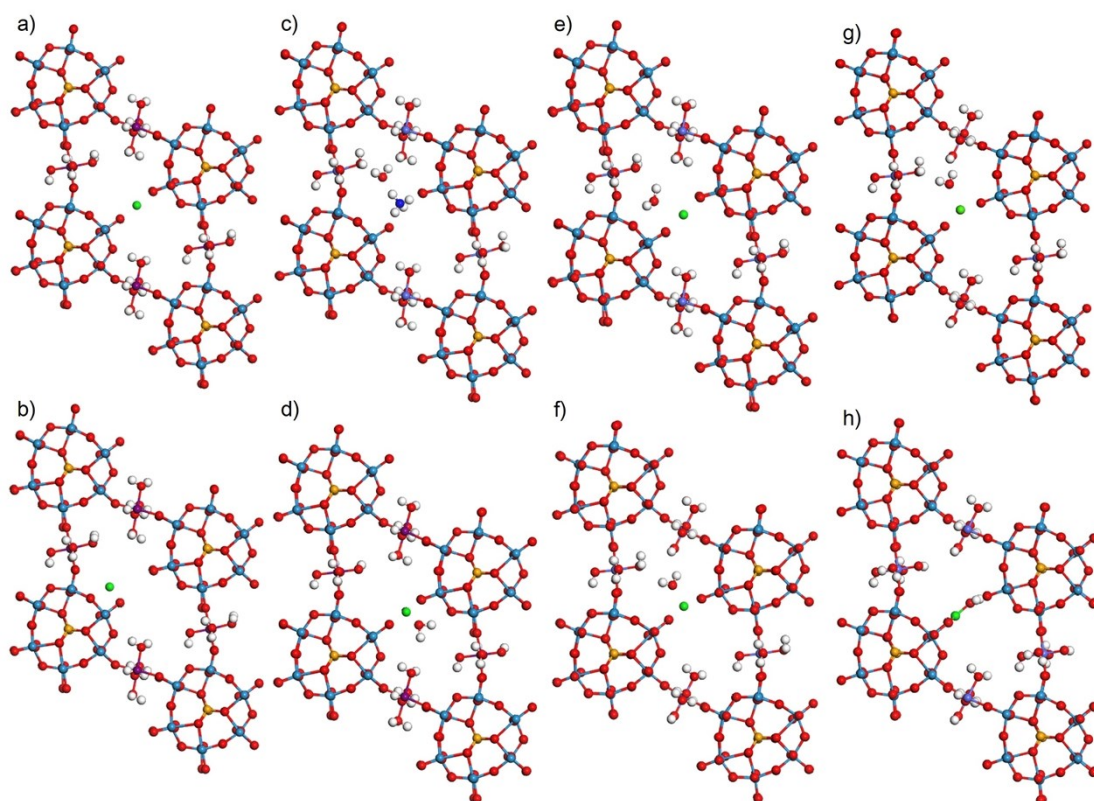

Figure S9. Simulated structures of **ZOMO-CT**, a) cation in A site,  $\Delta E = -80.1$  kJ/mol, b) cation in B site,  $\Delta E = 0$  kJ/mol, c) adsorbed structure of water in **ZOMO-CT**, d) adsorbed structure of water in **ZOMO-Na-CT**, e) adsorbed structure of water in **ZOMO-K-CT**, f) adsorbed structure of water in **ZOMO-Mg-CT**, g) adsorbed structure of water in **ZOMO-Ca-CT**, and h) adsorbed structure of water in **ZOMO-Al-CT**, W (blue), Se (yellow), Co (purple), O (red), N (deep blue), H (white), cation (green).

Table S1. Summary of present studies on pervaporation desalination by pervaporation

| Membrane                                                                                  | T (°C) | Salt rejection | Flux (kg·m <sup>-2</sup> ·h <sup>-1</sup> ) | Ref. |
|-------------------------------------------------------------------------------------------|--------|----------------|---------------------------------------------|------|
| Hybrid organic–inorganic membrane                                                         | 65     | 99.9%          | 11.7                                        | 4    |
|                                                                                           | 25     |                | 5.8                                         |      |
| Zeolitic imidazolate framework membranes                                                  | 50     | >99.8%         | 8.1                                         | 5    |
|                                                                                           | 75     |                | 10.8                                        |      |
|                                                                                           | 100    |                | 13.5                                        |      |
| Hydrophilic SPEEK/PES composite membrane                                                  | 70     | >99%           | 6                                           | 6    |
| NaA zeolite membrane                                                                      | 69     | >99.9%         | 1.9                                         | 7    |
| NaA zeolite membrane on coarse microporous $\alpha$ -Al <sub>2</sub> O <sub>3</sub> tubes | 75     | >99.9%         | 9.58                                        | 8    |
| Zeolite FAU membrane                                                                      | 30     | >99.8%         | 0.96                                        | 9    |
|                                                                                           | 90     |                | 5.64                                        |      |
| UiO-66-NH <sub>2</sub> membranes                                                          | 45     | >99.7%         | 1.51                                        | 10   |
|                                                                                           | 90     |                | 2.1                                         |      |
| A novel zeolite 3A incorporated polyether-block-amide composite membrane                  | 40     | 99.6%          | 4.57                                        | 11   |
| A novel green silica/PVA membrane                                                         | 60     | >99.9%         | 12.3                                        | 12   |
| Graphene oxide-sodium alginate membrane                                                   | 60     | 99.41%         | 8.11                                        | 13   |
| Natural zeolite membranes                                                                 | 93     | >97.5%         | 2.5                                         | 14   |
| Zeolite-like aluminophosphate membrane                                                    | —      | >99%           | 2.14                                        | 15   |
| Freestanding self-assembled sulfonated pentablock terpolymer membranes                    | 25     | 99.5%          | 3.32                                        | 16   |
| La/Y-codoped microporous organosilica membranes                                           | 25     | 100%           | 10.3                                        | 17   |
| This work                                                                                 | 65     | >99%           | 13.38                                       |      |

Table S2. ICP results for fresh and ion-exchanged soft framework

|                                              | Co <sup>2+</sup> | M <sup>a</sup> | NH <sub>4</sub> <sup>+</sup> | W | Se |
|----------------------------------------------|------------------|----------------|------------------------------|---|----|
| —                                            | 1.3              | -              | 0.4                          | 6 | 1  |
| 3.5 wt% AlCl <sub>3</sub> ·6H <sub>2</sub> O | 0.3              | 0.8            | 0                            | 6 | 1  |
| 3.5 wt% MgCl <sub>2</sub> ·6H <sub>2</sub> O | 1.1              | 0.4            | 0                            | 6 | 1  |
| 3.5 wt% CaCl <sub>2</sub>                    | 1.3              | 0.2            | 0                            | 6 | 1  |
| 3.5 wt% KCl                                  | 0.6              | 1.8            | 0                            | 6 | 1  |
| 3.5 wt% NaCl                                 | 0.45             | 2.1            | 0                            | 6 | 1  |

<sup>a</sup> M = Na, K, Mg, Ca, or Al

## Reference

- 1 Z. Zhang, M. Sadakane, S. I. Noro, N. Hiyoshi, A. Yoshida, M. Hara and W. Ueda, *Chem. - A Eur. J.*, 2017, **23**, 1972–1980.
- 2 B. Delley, *J. Chem. Phys.*, 2000, **113**, 7759–7764.
- 3 B. Delley, *J. Chem. Phys.*, 1990, **92**, 508–517.
- 4 Z. Xie, D. Ng, M. Hoang, T. Duong and S. Gray, *Desalination*, 2011, **273**, 220–225.
- 5 Y. Zhu, K. M. Gupta, Q. Liu, J. Jiang, J. Caro and A. Huang, *Desalination*, 2016, **385**, 75–82.
- 6 H. Zeng, S. Liu, J. Wang, Y. Li, L. Zhu, M. Xu and C. Wang, *Sep. Purif. Technol.*, 2020, **250**, 117265.
- 7 C. H. Cho, K. Y. Oh, S. K. Kim, J. G. Yeo and P. Sharma, *J. Memb. Sci.*, 2011, **371**, 226–238.
- 8 L. Wang, J. Yang, J. Wang, W. Raza, G. Liu, J. Lu and Y. Zhang, *Microporous Mesoporous Mater.*, 2020, **306**, 110360.
- 9 C. Zhou, J. Zhou and A. Huang, *Microporous Mesoporous Mater.*, 2016, **234**, 377–383.
- 10 L. Wan, C. Zhou, K. Xu, B. Feng and A. Huang, *Microporous Mesoporous Mater.*, 2017, **252**, 207–213.
- 11 F. U. Nigiz, S. Veli and N. D. Hilmioğlu, *Sep. Purif. Technol.*, 2017, **188**, 90–97.
- 12 D. A. Reino Olegário da Silva, L. C. Bosmuler Zuge and A. de Paula Scheer, *Sep. Purif. Technol.*, 2020, **247**, 116852.
- 13 F. Ugur Nigiz, *Desalination*, 2020, **485**, 114465.
- 14 P. Swenson, B. Tanchuk, A. Gupta, W. An and S. M. Kuznicki, *Desalination*, 2012, **285**, 68–72.
- 15 Y. Wang, X. Zou, L. Sun, H. Rong and G. Zhu, *Chem. Sci.*, 2018, **9**, 2533–2539.
- 16 E. R. Thomas, A. Jain, S. C. Mann, Y. Yang, M. D. Green, W. S. Walker, F. Perreault, M. L. Lind and R. Verduzco, *J. Memb. Sci.*, 2020, **613**, 118460.
- 17 H. Y. Zhang, J. L. Wen, Q. Shao, A. Yuan, H. T. Ren, F. Y. Luo and X. L. Zhang, *J. Memb. Sci.*, 2019, **584**, 353–363.
